# Supplementary material
Source: Springer Nature journal article supplement (https://www.springermedizin.de/resource/supplementary/12889_2009_1955_MOESM4_ESM.pdf/9485490)

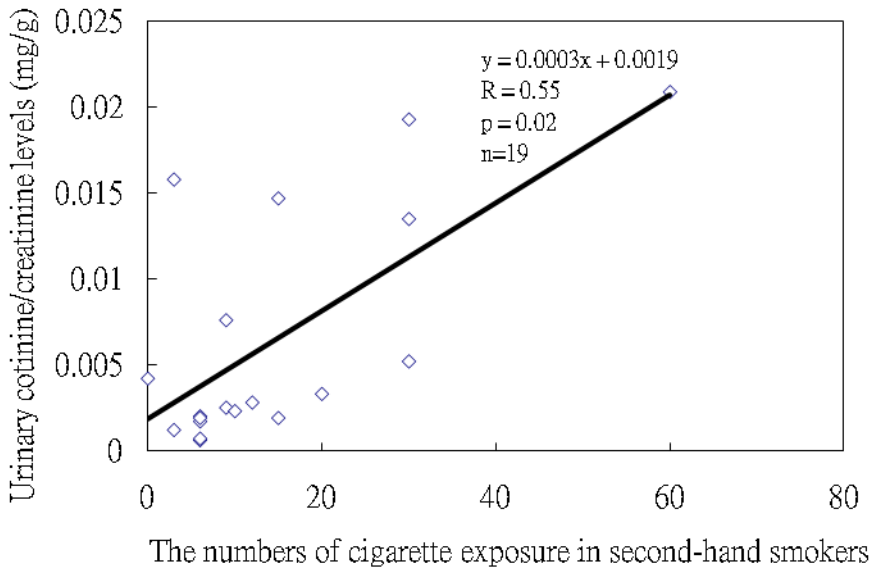

Supplement: MOESM4 [file 9485490]
